# Supplementary material for: Effects of Patient Preferences on Outcomes in the Predictors of Remission in Depression to Individual and Combined Treatments (PReDICT) Study
Source: Atypon-hosted journal article supplement (doi:10.1176/appi.ajp.2016.16050517), 2017-03-24
Supplement: appi.ajp.2016.16050517.ds001.pdf [file appi.ajp.2016.16050517.ds001.pdf]

## SUPPLEMENTARY DATA

### Effects of Patient Preferences on Outcomes in the Predictors of Remission in Depression to Individual and Combined Treatments (PReDICT) Study

Boadie W. Dunlop, MD<sup>1</sup>, Mary E. Kelley, PhD<sup>2</sup>, Vivianne Aponte-Rivera, MD<sup>3</sup>, Tanja Mletzko-Crowe, MA<sup>1</sup>, Becky Kinkead, PhD<sup>1</sup>, James C. Ritchie, PhD<sup>4</sup>, Charles B. Nemeroff, MD, PhD<sup>5</sup>, W. Edward Craighead, PhD<sup>1,6\*</sup>, Helen S. Mayberg, MD<sup>1,7\*</sup>, for the PReDICT Team.

**CONTENTS:** 1 Figure, 5 Tables.

#### Figure Legends

**Figure S1.** CONSORT Diagram for PReDICT Study

CBT: cognitive behavior therapy; DUL: duloxetine; ESC: escitalopram

#### Tables

**Table S1.** Depression and anxiety rating scale outcomes

**Table S2.** Outcomes of patients matched and mismatched to preferred treatments

**Table S3.** Predictors and moderators of remission in the per-protocol completer sample (n=234)

**Table S4.** Predictors and moderators of remission in the LOCF sample (n=316)

**Table S5.** Predictors and moderators of completion among all randomized subjects (n=344)

Figure S1. CONSORT Diagram for PRedICT Study

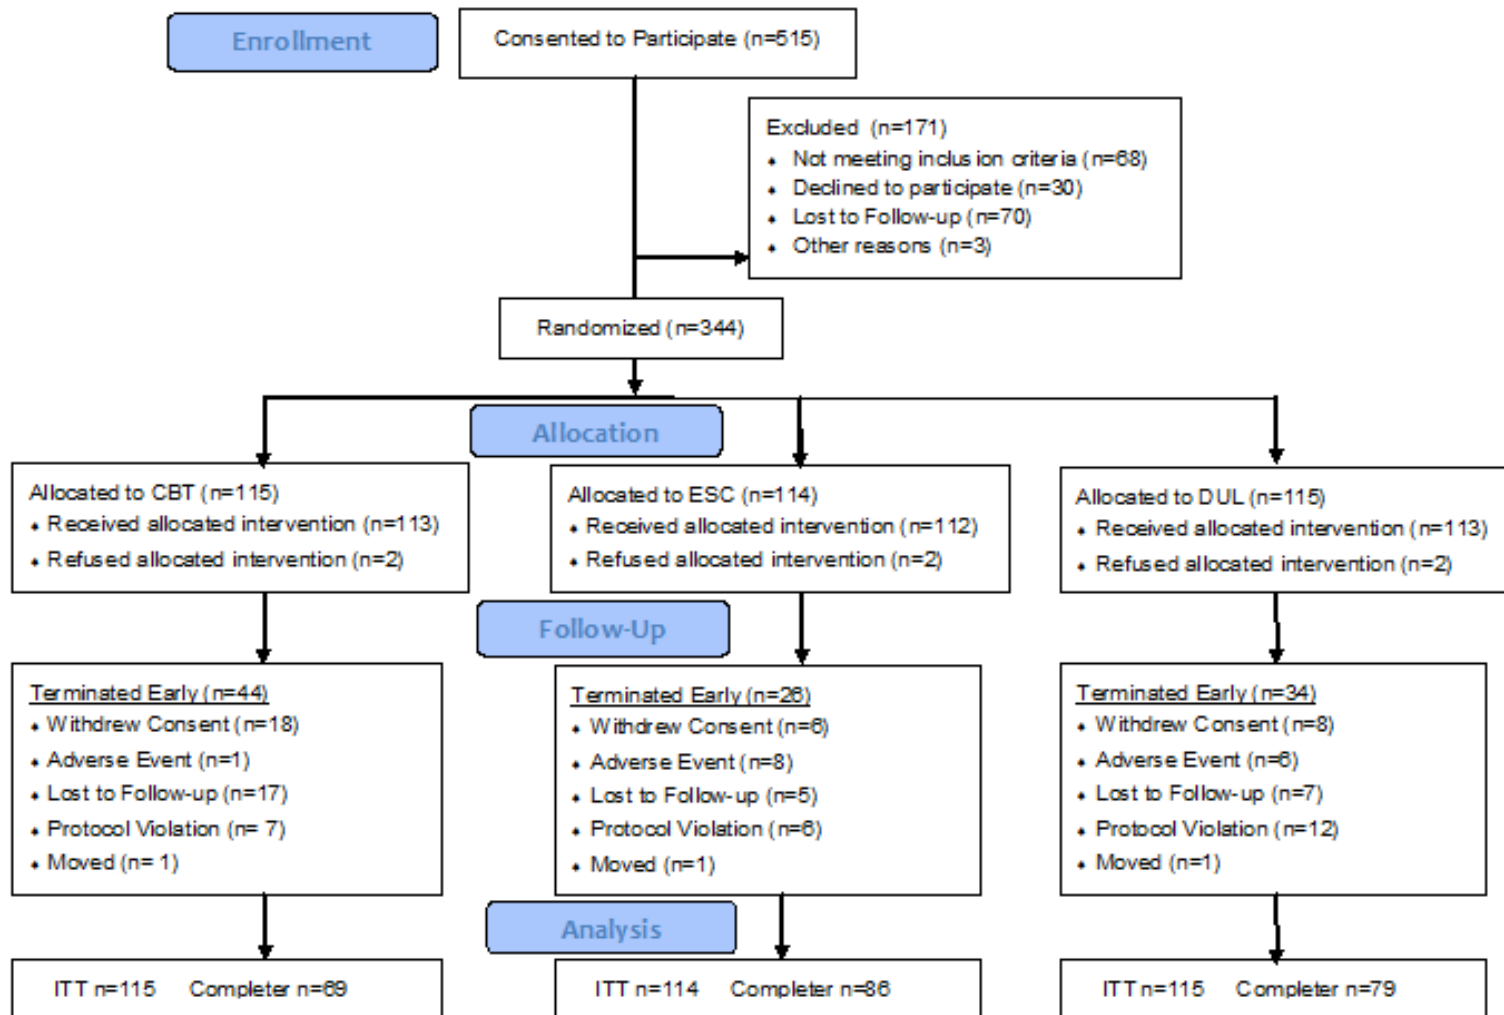

**Table S1. Depression and anxiety rating scale outcomes**

| <b>Intent to Treat Sample (n=344)</b> |             |             |         |                      |            |         |                    |           |         |       |       |
|---------------------------------------|-------------|-------------|---------|----------------------|------------|---------|--------------------|-----------|---------|-------|-------|
| Measure                               | CBT (n=115) |             |         | Escitalopram (n=114) |            |         | Duloxetine (n=115) |           |         | F     | p     |
|                                       | Baseline    | Endpoint    | Change* | Baseline             | Endpoint   | Change* | Baseline           | Endpoint  | Change* |       |       |
| Maximum n                             | 115         | 73          |         | 114                  | 92         |         | 115                | 86        |         |       |       |
| HAM-D                                 | 19.7 (3.7)  | 8.8 (7.0)   | -10.2   | 20.1 (3.7)           | 7.9 (6.1)  | -11.1   | 19.6 (3.9)         | 7.2 (5.3) | -11.2   | 0.531 | 0.589 |
| MADRS                                 | 27.2 (5.7)  | 12.5 (10.6) | -14.5   | 27.0 (4.9)           | 11.1 (8.8) | -15.0   | 26.8 (5.3)         | 9.3 (8.1) | -15.9   | 0.535 | 0.586 |
| BDI                                   | 22.2 (7.5)  | 8.6 (8.7)   | -13.5   | 23.1 (7.2)           | 7.1 (7.3)  | -14.2   | 23.4 (7.3)         | 6.6 (6.5) | -14.7   | 0.389 | 0.678 |
| QIDS-SR                               | 13.9 (4.0)  | 6.0 (4.8)   | -7.7    | 14.1 (3.9)           | 5.5 (4.2)  | -7.8    | 14.0 (4.2)         | 5.0 (4.1) | -8.2    | 0.268 | 0.765 |
| HAM-A                                 | 16.2 (4.9)  | 7.7 (5.8)   | -7.8    | 16.6 (5.4)           | 7.1 (6.0)  | -8.5    | 15.3 (5.2)         | 5.9 (5.1) | -8.4    | 0.319 | 0.727 |

  

| <b>Per-Protocol Completer Sample (n=234)</b> |             |             |        |                      |            |        |                    |           |        |       |       |
|----------------------------------------------|-------------|-------------|--------|----------------------|------------|--------|--------------------|-----------|--------|-------|-------|
| Measure                                      | CBT (n= 69) |             |        | Escitalopram (n= 86) |            |        | Duloxetine (n= 79) |           |        | F     | p     |
|                                              | Baseline    | Endpoint    | Change | Baseline             | Endpoint   | Change | Baseline           | Endpoint  | Change |       |       |
| HAM-D                                        | 18.8 (3.4)  | 8.7 (6.9)   | -9.8   | 19.7 (3.6)           | 7.5 (6.0)  | -11.1  | 18.9 (3.4)         | 7.2 (5.3) | -10.6  | 0.883 | 0.415 |
| MADRS                                        | 26.0 (4.7)  | 12.2 (10.2) | -14.3  | 26.6 (4.7)           | 10.5 (8.8) | -15.0  | 26.2 (4.8)         | 9.3 (8.1) | -15.5  | 0.349 | 0.706 |
| BDI                                          | 21.3 (6.9)  | 8.3 (8.1)   | -12.9  | 22.6 (6.8)           | 6.7 (7.1)  | -13.8  | 23.3 (6.9)         | 6.7 (6.6) | -13.9  | 0.357 | 0.700 |
| QIDS-SR                                      | 13.2 (3.6)  | 5.9 (4.6)   | -7.1   | 14.1 (3.7)           | 5.2 (4.0)  | -7.8   | 13.9 (3.9)         | 4.9 (3.9) | -7.8   | 0.578 | 0.557 |
| HAM-A                                        | 15.3 (4.2)  | 7.4 (5.5)   | -7.4   | 16.3 (5.2)           | 6.9 (6.0)  | -8.5   | 14.5 (4.5)         | 5.9 (5.0) | -7.9   | 0.778 | 0.461 |

\* Change based on model estimates from growth curve model of bi-monthly data.

BDI: Beck Depression Inventory; CBT: cognitive behavior therapy; HAM-A: Hamilton Anxiety Rating Scale; HAM-D: 17-item Hamilton Depression Rating Scale; MADRS: Montgomery Asberg Depression Rating Scale; QIDS-SR: Quick Inventory of Depressive Symptoms, Self-Report

**Table S2. Outcomes of patients matched and mismatched to preferred treatments**

| <b>Outcome</b> | <b>Mismatched to Preference</b>                  |                                                  |                                 | <b>Matched to Preference</b> |                      |                                 |
|----------------|--------------------------------------------------|--------------------------------------------------|---------------------------------|------------------------------|----------------------|---------------------------------|
|                | <b>Preferred CBT,<br/>received ADM<br/>N (%)</b> | <b>Preferred ADM,<br/>received CBT<br/>N (%)</b> | <b>Any preference<br/>N (%)</b> | <b>CBT<br/>N (%)</b>         | <b>ADM<br/>N (%)</b> | <b>Any preference<br/>N (%)</b> |
| Remitted       | 33 (44.6)                                        | 10 (33.3)                                        | 43 (41.3)                       | 21 (55.3)                    | 31 (47.7)            | 52 (50.5)                       |
| Not Remitted   | 41 (55.4)                                        | 20 (66.7)                                        | 61 (58.7)                       | 17 (44.7)                    | 34 (52.3)            | 51 (49.5)                       |
| <b>TOTAL</b>   | <b>74 (100)</b>                                  | <b>30 (100)</b>                                  | <b>104 (100)</b>                | <b>38 (100)</b>              | <b>65 (100)</b>      | <b>103 (100)</b>                |

CBT: Cognitive behavior therapy

Remission defined by 17-item HAM-D score  $\leq 7$  at both weeks 10 and 12.

Note: The raw percentages shown were weighted to calculate the odds ratios reported in Table 3

**Table S3. Predictors and Moderators of Remission in the Per-Protocol Completer sample (n=234)**

| Variable                 | Predictor effect    |    |        | Predictor x Treatment interaction effect |    |       |
|--------------------------|---------------------|----|--------|------------------------------------------|----|-------|
|                          | Wald X <sup>2</sup> | df | p      | Wald X <sup>2</sup>                      | df | p     |
| Severity (HAM-D)         | 4.394               | 1  | 0.036* | 0.521                                    | 2  | 0.771 |
| Chronic episode          | 0.016               | 1  | 0.899  | 2.539                                    | 2  | 0.281 |
| Age                      | 2.258               | 1  | 0.133  | 1.211                                    | 2  | 0.546 |
| Anxiety (HAM-A)          | 8.652               | 1  | 0.003* | 0.525                                    | 2  | 0.769 |
| Current Anxiety Disorder | 6.031               | 1  | 0.014* | 0.063                                    | 2  | 0.969 |
| Gender                   | 2.976               | 1  | 0.085  | 0.067                                    | 2  | 0.967 |
| Race                     | 0.410               | 2  | 0.815  | 8.150                                    | 4  | 0.086 |
| Married/cohabitating     | 1.785               | 1  | 0.182  | 0.683                                    | 2  | 0.711 |
| Employed full time       | 0.047               | 1  | 0.828  | 4.161                                    | 2  | 0.125 |

\* p<.05

**Table S4. Predictors and Moderators of Remission in the LOCF sample (n=316)**

| Variable                 | Predictor effect    |    |          | Predictor x Treatment interaction effect |    |       |
|--------------------------|---------------------|----|----------|------------------------------------------|----|-------|
|                          | Wald X <sup>2</sup> | df | p        | Wald X <sup>2</sup>                      | df | p     |
| Severity (HAM-D)         | 11.254              | 1  | 0.001*   | 3.389                                    | 2  | 0.184 |
| Chronic episode          | 0.045               | 1  | 0.833    | 0.348                                    | 2  | 0.840 |
| Age                      | 2.386               | 1  | 0.122    | 0.174                                    | 2  | 0.917 |
| Anxiety (HAM-A)          | 15.947              | 1  | <0.0005* | 0.214                                    | 2  | 0.899 |
| Current Anxiety Disorder | 4.852               | 1  | 0.028*   | 0.516                                    | 2  | 0.773 |
| Gender                   | 1.317               | 1  | 0.251    | 0.595                                    | 2  | 0.743 |
| Race                     | 0.057               | 2  | 0.972    | 6.195                                    | 4  | 0.185 |
| Married/cohabitating     | 1.922               | 1  | 0.166    | 2.418                                    | 2  | 0.299 |
| Employed full time       | 0.081               | 1  | 0.776    | 2.865                                    | 2  | 0.239 |

\* p<.05

**Table S5. Predictors and Moderators of completion among all randomized subjects (n=344)**

| Variable                 | Predictor effect    |    |          | Predictor x Treatment interaction effect |    |       |
|--------------------------|---------------------|----|----------|------------------------------------------|----|-------|
|                          | Wald X <sup>2</sup> | df | p        | Wald X <sup>2</sup>                      | df | p     |
| Severity (HAM-D)         | 21.473              | 1  | <0.0005* | 0.462                                    | 2  | 0.794 |
| Chronic episode          | 0.072               | 1  | 0.789    | 3.155                                    | 2  | 0.206 |
| Age                      | 0.137               | 1  | 0.711    | 0.654                                    | 2  | 0.721 |
| Anxiety (HAM-A)          | 10.188              | 1  | 0.001*   | 1.107                                    | 2  | 0.575 |
| Current Anxiety Disorder | 0.407               | 1  | 0.524    | 0.789                                    | 2  | 0.674 |
| Gender                   | 0.965               | 1  | 0.326    | 2.967                                    | 2  | 0.227 |
| Race                     | 10.084              | 2  | 0.006*   | 3.430                                    | 4  | 0.489 |
| Married/cohabitating     | 0.101               | 1  | 0.750    | 0.565                                    | 2  | 0.754 |
| Employed full time       | 2.315               | 1  | 0.128    | 0.003                                    | 2  | 0.999 |

\* p<.05
